1 **Species and sex divergence in vocalizations between hybridizing role-reversed**  
2 **shorebirds, Northern Jacana (*Jacana spinosa*) and Wattled Jacana (*Jacana***  
3 ***jacana*)**

4  
5 Evan J. Buck<sup>1</sup>, Toni Brown<sup>2</sup>, Gina Zwicky<sup>2</sup>, Elizabeth P. Derryberry<sup>1,2</sup>, Sara E. Lipshutz<sup>1,2,3\*</sup>

6 <sup>1</sup>Department of Ecology and Evolutionary Biology, University of Tennessee, Knoxville, TN,  
7 USA

8 <sup>2</sup>Department of Ecology and Evolutionary Biology, Tulane University, New Orleans, LA, USA

9 <sup>3</sup>Department of Biology, Indiana University, Bloomington, IN, USA

10 \* Corresponding author: [slipshut@iu.edu](mailto:slipshut@iu.edu)

11  
12 **ABSTRACT**—Species-specific vocalizations can act as a reproductive isolating mechanism  
13 between closely related populations. We analyzed vocal divergence between two hybridizing  
14 species of sex-role reversed polyandrous shorebirds, the Northern Jacana (*Jacana*  
15 *spinosa*) and Wattled Jacana (*Jacana jacana*). We found that *J. spinosa* calls have higher peak  
16 frequency and fundamental frequency than *J. jacana* calls. We also compared calls  
17 between males and females, as both jacana species are sex-role reversed and females compete for  
18 male mates. Males produce calls with a higher peak frequency, exhibit shorter note lengths and  
19 emit a greater number of notes within a calling bout than females, which could relate to mate  
20 attraction. These results suggest that vocal divergence could act as a behavioral barrier to limit  
21 hybridization between the species and vocalizations may function differently between male and  
22 female jacanas.

23

24 Key words: call, hybridization, jacanas, sex differences, shorebird, vocal divergence

25

26 **Resumen. Divergencia específica y sexual en las vocalizaciones de las aves costeras de roles**  
27 **sexuales invertidos Jacana Norteña (*Jacana spinosa*) y Jacana Carunculada (*Jacana***  
28 ***jacana*).**

29 Las vocalizaciones especie-específicas pueden actuar como mecanismos de aislamiento  
30 reproductivo entre poblaciones de especies estrechamente relacionadas. Analizamos la  
31 divergencia en vocalizaciones entre dos especies de aves costeras poliándricas de rol sexual  
32 invertido, Jacana Norteña (*Jacana spinosa*) y Jacana Carunculada (*Jacana jacana*). Encontramos  
33 que los llamados de *J. spinosa* contienen frecuencias pico y fundamental más altas que los  
34 llamados de *J. jacana*. También comparamos los llamados entre machos y hembras en ambas  
35 especies, ya que ambas tiene el rol sexual invertido y las hembras compiten por parejas. Los  
36 machos producen llamados con una frecuencia pico mayor, exhiben longitudes menores de notas  
37 y emiten un número mayor de notas dentro de un despliegue de vocalizaciones y producen notas  
38 de menor duración que las hembras, lo que podría relacionarse con atracción de pareja. Estos  
39 resultados sugieren que la divergencia en vocalizaciones podría actuar como barrera  
40 comportamental para limitar la hibridación entre las especies y estas vocalizaciones pueden  
41 funcionar distintamente entre machos y hembras de jacanas. Estudios futuros utilizando  
42 experimentos de reproducción de audio podrían poner a prueba estas hipótesis.

43 Palabras clave: llamada, hibridación, jacanas, diferencias de sexo, ave costera, divergencia vocal

44

45 Between closely related species, divergence in mating signals can facilitate reproductive  
46 isolation and drive the process of speciation (Irwin and Price 1999; Coyne and Orr 2004).  
47 Whereas mating signals are used to attract and compete for mates within populations, divergence  
48 between populations can lead to a breakdown in communication such that individuals do not  
49 recognize potential mates or rivals (Coyne and Orr 2004). Evidence from a wide range of taxa  
50 suggests that the degree of divergence in mating signals influences the extent to which  
51 individuals discriminate between congeners, which ultimately shapes mating outcomes  
52 (Andersson 1994). Therefore, it is important to understand how and why mating signals diverge  
53 between populations. Hybrid zones – regions where distinct species come into contact and  
54 interbreed – provide a natural experiment to examine the consequences of vocal divergence for  
55 behavioral isolation (Hewitt 1988).

56 Divergent mating signals can serve to reproductively isolate species with otherwise  
57 incomplete barriers to gene flow (Grant and Grant 1997; Price 2008). Learned vocalizations,  
58 such as oscine songs (Nottebohm 1972), have the potential to diverge rapidly via cultural  
59 evolution (Mason et al. 2016) and are therefore important pre-mating barriers to gene flow  
60 between hybridizing populations (Slabbekoorn and Smith 2002; Uy et al. 2018). In contrast,  
61 innate vocalizations diverge more slowly than learned vocalizations, and there is mixed evidence  
62 for the role of innate vocalizations as behavioral barriers to gene flow. For example, innate  
63 vocalizations serve as behavioral barriers to hybridization in *Alectoris* partridges (Ceugniet and  
64 Aubin 2001) and *Streptopelia* doves (De Kort et al. 2002), but not in *Callipepla* (Gee 2005), nor  
65 *Coturnix* quails (Derégnaucourt and Guyomarc'h 2003). This leaves an important gap in our  
66 understanding about innately derived vocalizations and how they vary between closely related  
67 species that are hybridizing.

68           In many bird species, both males and females vocalize (Odom and Benedict 2018). Vocal  
69 traits such as note length, complexity or production rate may differ between the sexes depending  
70 on their function in courtship and other behavioral contexts (Appleby et al. 1999; Odom and  
71 Mennill 2010; ten Cate 1997). For example, the sex that competes more for mates tends to  
72 vocalize more often (Sordahl 1979; Sung et al. 2005). Whereas male competition for mates is  
73 common across animals, females of some species are sex-role reversed, meaning they face  
74 stronger competition for mates than males do (Emlen and Oring 1977). Currently, we know very  
75 little about how female and male vocalizations compare in sex-role reversed species.

76           Sexually dimorphic vocalizations may also occur due to physical differences between  
77 males and females. In many species the sexes diverge in body size. As a consequence,  
78 morphological constraints on sound production can lead to distinctive spectral and temporal  
79 characteristics between male and female vocalizations (Ryan and Brenowitz 1985; Ten Cate  
80 1997). Consistent with signal design theory, larger body size is often associated with lower  
81 sound frequencies both between and within sexes (Barbraud et al. 2000; Maurer et al. 2008).  
82 Some taxa are exceptions to this rule; for example, many female owls are larger than males but  
83 have higher frequency calls (Odom and Mennill 2010). Therefore, it is not clear whether signal  
84 design theory will hold in sex-role reversed species, in which females are often larger than  
85 males.

86           Jacanas are tropical, sex-role reversed shorebirds in which selection on females to  
87 compete for mates is stronger than on males (Jenni 1974). The Northern Jacana (*Jacana spinosa*)  
88 and Wattled Jacana (*J. jacana*) have been isolated for 700,000 years (Miller et al. 2014) and  
89 hybridize in a narrow region in Panama (Lipshutz et al. 2019). It is unknown whether their  
90 vocalizations are divergent, and what role their calls play in maintaining reproductive isolation

91 between the species. Here, we quantify variation in temporal and spectral characteristics  
92 between the species and the sexes. We predict that vocalizations between *J. spinosa* and *J.*  
93 *jacana* will be divergent, and that the larger-bodied *J. spinosa* will have lower frequency-related  
94 characteristics. Second, we examine vocal divergence between males and females of both  
95 species. Jacanas have extreme sexual dimorphism in size, and females weigh up to 60% more  
96 than males (Emlen and Wrege 2004; Jenni and Collier 1972). Because female jacanas are larger  
97 than males, we predict that female vocalizations will have lower frequency-related  
98 characteristics. We also predicted that females should produce more calls than males, given that  
99 these species are sex-role reversed.

100

101

## Methods

### 102 Sound recordings

103 We recorded vocalizations from June-August 2015 and June-July 2018 at 9 different sites in  
104 Panama (Fig. 1). Across these sites we recorded a total of 12 individuals of each species and sex.  
105 Birds were either stimulated with playback and a taxidermic mount to elicit vocalizations, or in  
106 some cases vocalizations were stimulated by the presence of the recordist near the bird's  
107 territory.

108 Recordings were made using a Marantz PMD661 MKII solid state digital recorder  
109 (Marantz professional, Cumberland, Rhode Island, United States) set at 44.1 kHz sampling rate,  
110 16-bit, and WAV file type, and a Sennheiser K6 power module with a Sennheiser M67 shotgun  
111 microphone and windscreen (Sennheiser electronic corporation, Wedemark, Germany). We  
112 divided continuous recordings for each individual into discrete call bouts (average = 6.1, range =

113 1-32 call bouts per individual) in Audacity 2.1.2 (Audacity 2018). Call bouts are defined as a  
114 series of evenly spaced notes less than 1 second apart.

### 115 **Acoustic measurement**

116 Jacana vocalizations contain harmonics covering a wide frequency bandwidth (Mace 1981). We  
117 took measurements on one call type, repeated note calls (Jenni 1974), as these were consistently  
118 found in recordings of both species and sexes (Fig. 2). We used the sound-analysis software  
119 Luscinia (Lachlan 2007) to generate Fourier-based spectrograms. Calls were high pass filtered to  
120 eliminate low frequency background noise below 200 Hz. We used the following settings to  
121 measure call variation: FF jump suppression = 20, Max. Frequency (Hz) = 15,000, Frame length  
122 (ms) = 5, Time step (ms) = 1, Spectrograph points = 221, Spectrogram Overlap % = 80, Dynamic  
123 range (dB) = 50, Dynamic equalization (ms) = 0, Dynamic comp. % = 100, Dereverberation % =  
124 200, Dereverberation range (ms) = 100, Windowing function = Gaussian, Frequency zoom % =  
125 150, Time zoom % = varies, Noise removal (dB) = 0, NR range1 (ms) = 50, R range2 (ms) = 50.

126 We manually measured vocalizations in Luscinia (Lachlan 2007) by individually tracing  
127 each note. We used the Luscinia software to automatically calculate three acoustic parameters:  
128 note length (msec), peak frequency (frequency of the maximum amplitude, Hz), and fundamental  
129 frequency (Hz). We averaged these parameters for each note within a call bout (range 2-70 notes,  
130 mean 11.6) (Table 1). We also averaged the number of notes per bout for each individual to  
131 calculate a fourth acoustic parameter, notes per bout. The four parameters were averaged in  
132 Microsoft Excel after exporting from Luscinia.

### 133 **Statistical analysis**

134 We compared the four call parameters between the species and sexes using Student's *t*-tests or  
135 Wilcoxon rank sum, depending on whether the parameters were normally distributed or not.

136 We also summarized the four acoustic parameters with a principal components analysis  
137 (PCA) using the `prcomp` function in R version 3.3.2 (R-Core-Team, 2015). Prior to the PCA, we  
138 log-transformed acoustic data to fulfill assumptions of multi-normality. We retained two PC  
139 scores that explained 60.6% and 19.7% of the variation in the acoustic parameters, totaling  
140 80.7% cumulative proportion of variation (Table S1). Frequency variables loaded negatively  
141 onto PC1 and positively onto PC2. Note length loaded positively on PC1 and PC2, and notes per  
142 bout loaded negatively onto PC1 and PC2. We compared vocalizations between the species and  
143 sexes using linear mixed effects models with the `nlme` package (Pinheiro et al. 2018) in R. We  
144 included vocalization PC1 and PC2 as separate response variables, species and sex as the fixed  
145 effects, and site as a random effect. We visually inspected residual plots to ensure they did not  
146 deviate from normality. We used a type III ANOVA to determine whether species and/or sex  
147 were significant predictors of variation in the PCs.

148 We also conducted a discriminant function analysis (DFA) in R using the package  
149 `flipMultivariates` to assess whether spectral or temporal parameters could distinguish between  
150 species and sexes (<https://github.com/Displayr/flipMultivariates/>).

151

152

## Results

### Species differences in vocalizations

154 Vocalizations are different between these two jacana species, particularly regarding spectral  
155 characteristics (Table 1; Fig. 3). For both males and females, *J. spinosa* calls have significantly  
156 higher peak ( $t = -5.1$ ,  $df = 41.8$ ,  $P < 0.001$ ) and fundamental frequencies ( $W = 42$ ,  $P < 0.001$ )  
157 than *J. jacana* calls. Species was also a significant predictor both of vocalization PC1 ( $F_{1,7} =$   
158  $24.8$ ,  $P = 0.002$ ) and PC2 ( $F_{1,7} = 16.7$ ,  $P = 0.005$ ) (Fig. S1). Using all acoustic parameters, 44 out

159 of 48 (92%) individuals were classified to the correct species by a DFA. The best variables to  
160 distinguish the species were peak frequency ( $r^2 = 0.36$ ,  $P < 0.001$ ) and fundamental frequency ( $r^2$   
161  $= 0.48$ ,  $P < 0.001$ ).

## 162 **Sex differences in vocalizations**

163 Vocalizations are also different between males and females of both species (Table 1; Fig. 3).  
164 When species are combined, males have significantly more calls within a bout ( $W = 189.5$ ,  $P =$   
165  $0.043$ ) and higher peak frequency calls ( $t = -2.7$ ,  $df = 44.9$ ,  $P = 0.009$ ) than females. Females  
166 have longer calls than males ( $t = 3.1$ ,  $df = 40.7$ ,  $P = 0.003$ ). Sex was also a significant predictor  
167 of vocalization PC1 ( $F_{1,38} = 14.8$ ,  $P = < 0.001$ ) but not of PC2 (Fig. S1). Using all acoustic  
168 parameters, 45 out of 48 (73%) individuals were classified to the correct sex by a DFA. The best  
169 variables to distinguish the sexes were call length ( $r^2 = 0.17$ ,  $P = 0.005$ ), peak frequency ( $r^2 =$   
170  $0.14$ ,  $P = 0.014$ ), and calls within a bout ( $r^2 = 0.12$ ,  $P = 0.028$ ).

171 The sexes were more strongly differentiated by peak frequency in *J. jacana* ( $t = -3.0193$ ,  
172  $df = 21.98$ ,  $P = 0.006$ ) than in *J. spinosa* ( $t = -1.9602$ ,  $df = 21.999$ ,  $P = 0.063$ ). Similarly, males  
173 and females differed more strongly in note length in *J. jacana* ( $t = 3.3939$ ,  $df = 19.602$ ,  $P =$   
174  $0.003$ ) than in *J. spinosa* ( $t = 1.6899$ ,  $df = 19.318$ ,  $P = 0.11$ ). In contrast, the sexes differed more  
175 strongly in calls within a bout for *J. spinosa* ( $W = 38.5$ ,  $P = 0.057$ ) than *J. jacana* ( $W = 53$ ,  $P =$   
176  $0.29$ ).

177

178

## **Discussion**

179 *Jacana spinosa* and *J. jacana* calls are different - *J. spinosa* calls are significantly higher  
180 in peak and fundamental frequency. The sexes are consistently different across both species,



181 such that male calls have higher peak frequency and more notes than female calls, whereas  
182 female calls have longer note lengths.

### 183 **Species Differences**

184 Vocalizations of the two species of jacana have diverged spectrally but are similar temporally. In  
185 other species of non-oscine birds that do not learn their songs, temporal traits change at slower  
186 rates than frequency-related traits (Miller and Baker 2009, Seneviratne et al. 2012), which is  
187 consistent with our findings that spectral traits were more divergent than temporal traits between  
188 these jacana species. Counter to the prediction that smaller-bodied species should have calls with  
189 higher frequencies (Ryan and Brenowitz 1985), larger-bodied *J. spinosa* have higher peak and  
190 fundamental frequency vocalizations than smaller-bodied *J. jacana*, for both sexes. One  
191 hypothesis for this contradiction is that species divergence in vocalizations could relate to  
192 differing environmental or habitat characteristics that have shaped their call frequencies (Morton  
193 1975, Endler 1992). In a prior study, species distribution modeling indicated that *J. spinosa*  
194 favors a warmer and wetter environment (Miller et al. 2014), suggesting that the species have  
195 diverged in habitat preferences. Future work could compare the vegetative cover in the habitat of  
196 each species to determine whether the higher frequency vocalizations of *J. spinosa* relate to a  
197 more open habitat. Another potential explanation for vocal divergence could be a difference in  
198 the syringeal or bill structure between species (Seneviratne et al. 2012; Kingsley et al. 2018).

### 199 **Sex Differences**

200 We found that frequency differences in jacana vocalizations matched our predictions for females  
201 and males based on their body size dimorphism; males of both species produce higher frequency  
202 calls than the larger-bodied females. In many species with sexually dimorphic body size, the  
203 smaller of the two sexes produces higher frequency vocalizations (Maurer et al. 2008). Female-

204 biased size dimorphism is common in shorebirds other than jacanas, and larger females also have  
205 lower frequency calls (Heidemann and Oring 1976; Douglas 1998). Contrary to our expectation,  
206 male jacanas within our study also emitted more notes per calling bout than females. One likely  
207 explanation for this is mate attraction: in the polyandrous Bronze-winged Jacana (*Metopidius*  
208 *indicus*), individual males that called more frequently received more copulations than other co-  
209 mates (Butchart et al. 1999). Calling rate could be a sexually selected trait in male Neotropical  
210 jacanas, and this hypothesis should be tested using behavioral playback experiments.

### 211 **Application and conclusion**

212 We found that Neotropical jacanas diverged significantly in the peak and fundamental  
213 frequencies of their vocalizations. Diverged vocal signals could promote reproductive isolation  
214 between the two species when they come into contact. Furthermore, these spectral characteristics  
215 differed between the species for both sexes, suggesting that both male and female signals could  
216 facilitate species-specific discrimination in the hybrid zone. A phenotypic and genomic analysis  
217 of the jacana hybrid zone found that species-specific traits such as plumage and facial  
218 ornamentation were likely prezygotic barriers that maintain species boundaries (Lipshutz et al.  
219 2019). Future playback studies could assess the relative role of visual and vocal signals as  
220 behavioral barriers to mating between the species. This phenotypic differentiation between *J.*  
221 *spinosa* and *J. jacana* likely contributes to the low occurrence of hybrids within the narrow  
222 hybrid zone and may be one of the reasons for limited hybridization between the species.

223

224

### **Acknowledgments**

225 This material is supported by the University of Tennessee's Ready for the World Chancellor's  
226 Honors Program and Summer Undergraduate Research Internship to EJB, National Science

227 Foundation Graduate Research Fellowship Grant No. 1154145, Doctoral Dissertation  
228 Improvement Grant IOS-1818235, and a Smithsonian Tropical Research Institute short-term  
229 fellowship to SEL, Tulane University's CELT summer research and faculty-student scholarly  
230 engagement grants to TB, Tulane University's Newcomb Scholars and Dean's summer research  
231 grants to GZ, and a Louisiana Board of Regents NSF EPSCoR LINK Grant No. 177 to EPD.  
232 Any opinion, findings, and conclusions or recommendations expressed in this material are those  
233 of the author(s) and do not necessarily reflect the views of the National Science Foundation.  
234 Scientific recording in Panama is done with the prior approval of MiAmbiente (formerly  
235 ANAM), Panama's environmental authority (permit numbers: SE/A-45-12, SE/A-46-14, SE/A-  
236 17-18), and recording techniques were approved by the Institutional Animal Care and Use  
237 Committee of the Smithsonian Tropical Research Institute (IACUC permits: 2012-0315-2015,  
238 2018-0116-2021), Tulane University (IACUC permit: 0446R), and the University of Tennessee  
239 (IACUC permit: 2573). We thank the STRI Bird Collection for preparing taxidermic mounts.  
240 Daniel Ernesto Buitrago and Marcelo Araya Salas assisted with translating the abstract into  
241 Spanish. Jacana illustrations by Stephanie McClelland.

242

#### 243 **Data accessibility**

244 Recordings are available on xeno canto. *Jacana spinosa*: <https://www.xeno-canto.org/set/4909>

245

246

#### 247 **Literature Cited**

248 Andersson M. 1994. Sexual selection (Monographs in behavior and ecology). Princeton (NJ):

249 Princeton University Press.

250 Appleby BM, Yamaguchi N, Johnson PJ, MacDonald DW. 1999. Sex-specific territorial

251 responses in Tawny Owls *Strix aluco*. *Ibis*. 141:91–99.

252 Audacity. 2018. Audacity ® | Free, open source, cross-platform audio software for multi-track

253 recording and editing. Audacity. doi: ISSN 1980-4431.

254 Baker MC, Boylan JT. 1999. Singing Behavior, Mating Associations and Reproductive Success

255 in a Population of Hybridizing Lazuli and Indigo Buntings. *The Condor*. 101:493-504.

- 256 Barbraud C, Mariani A, Jouventin P. 2000. Variation in call properties of the snow petrel,  
257 *Pagodroma nivea*, in relation to sex and body size. *Australian Journal of Zoology*.  
258 48:421–430.
- 259 Butchart S, Seddon N, Ekstrom JMM. 1999. Yelling for sex: Harem males compete for female  
260 access in bronze-winged jacanas. *Animal Behaviour*. 57:637–646.
- 261 Catchpole CK, Slater PJB. 2008. *Bird song: Biological themes and variations*, second edition.  
262 Cambridge (UK): Cambridge University Press.
- 263 Ceugniet M, Aubin T. 2001. The rally call recognition in males of two hybridizing partridge  
264 species, red-legged (*Alectoris rufa*) and rock (*A. graeca*) partridges. *Behavioural*  
265 *Processes*. 55:1–12.
- 266 Coyne JA, Orr AH. 2004. *Speciation*. Sunderland (MA): Sinauer Associates.
- 267 De Kort SR, Den Hartog PM, Ten Cate C. 2002. Vocal signals, isolation and hybridization in the  
268 vinaceous dove (*Streptopelia vinacea*) and the ring-necked dove (*S. capicola*). *Behavioral*  
269 *Ecology and Sociobiology*. 51:378–385.
- 270 Derégnaucourt S, Guyomarch JC. 2003. Mating call discrimination in female European  
271 (*Coturnix c. coturnix*) and Japanese quail (*Coturnix c. japonica*). *Ethology*. 109:107–119.
- 272 Douglass HD. 1998. Response of Eastern Willets (*Catoptrophorus s. semipalmatus*) to  
273 Vocalizations of Eastern and Western (*C. s. inornatus*) Willets. *The Auk*. 115:514–518.
- 274 Emlen ST, Oring LW. 1977. Ecology, sexual selection, and the evolution of mating  
275 systems. *Science*. 197:215–223.
- 276 Emlen ST, Wrege PH. 2004. Size Dimorphism, Intrasexual Competition, and Sexual Section in  
277 Wattled Jacana (*Jacana jacana*), a Sex-Role-Reversed Shorebird in Panama. *The Auk*.  
278 121:391–403.

- 279 Endler J. 1992. Signals, Signal Conditions, and the Direction of Evolution. *The American*  
280 *Naturalist* 139:S125.
- 281 Gee JM. 2005. No species barrier by call in an avian hybrid zone between California and  
282 Gambels quail (*Callipepla californica* and *C. gambelii*). *Biological Journal of the Linnean*  
283 *Society*. 86:253–264.
- 284 Grant PR, Grant BR. 1997. Genetics and the origin of bird species. *Proceedings of the National*  
285 *Academy of Sciences*. 94:7768–7775.
- 286 Hunt J, Breuker CJ, Sadowski JA, Moore AJ. 2009. Male-male competition, female mate choice  
287 and their interaction: Determining total sexual selection. *Journal of Evolutionary Biology*.  
288 22:13–26.
- 289 Heidemann MK, Oring LW. 1976. Functional Analysis of Spotted Sandpiper (*Actitis macularia*)  
290 Song. *Behaviour*. 56:181–193.
- 291 Irwin DE, Price T. 1999. Sexual imprinting, learning and speciation, *Heredity*. 82:347–354.
- 292 Jenni DA. 1974. Evolution of polyandry in birds. *Integrative and Comparative Biology*. 14:129–  
293 144.
- 294 Jenni DA, Collier G. 1972. Polyandry in the American Jaçana (*Jacana spinosa*). *The Auk*.  
295 89:743–765.
- 296 Kingsley EP, Eliason CM, Riede T, Li Z, Hiscock TW, Farnsworth M, Thomson SL, Goller F,  
297 Tabin CJ, Clarke JA. 2018. Identity and novelty in the avian syrinx. *Proceedings of the*  
298 *National Academy of Sciences*. 115:10209-10217.
- 299 Konishi M. 1963. The Role of Auditory Feedback in the Vocal Behavior of the Domestic Fowl.  
300 *Zeitschrift für Tierpsychologie*. 20:349–367.
- 301 Lachlan RF. 2007. *Luscinia*: a bioacoustics analysis computer program.

- 302 Lipshutz SE, Meier JI, Derryberry GE, Miller MJ, Seehausen O, Derryberry EP. 2019.  
303 Differential introgression of a female competitive trait in a hybrid zone between sex-role  
304 reversed species. *Evolution*. 73:188–201.
- 305 Lynch A. 1996. The population memetics of birdsong. In: Kroodsma DE, Miller EH, editors.  
306 Ecology and evolution of acoustic communication in birds. Ithaca (NY): Comstock  
307 Publishers; p.181–197.
- 308 Mace TR. 1981. Causation, function, and variation of the vocalizations of the Northern Jacana,  
309 *Jacana spinosa*. [dissertation]. Missoula (MT): University of Montana.
- 310 Mason NA, Burns KJ, Tobias JA, Claramunt S, Seddon N, Derryberry EP. 2016. Song evolution,  
311 speciation, and vocal learning in passerine birds. *Evolution*. 71:786–796.
- 312 Maurer G, Smith C, Süsser M, Magrath RD. 2008. Solo and duet calling in the pheasant coucal:  
313 Sex and individual call differences in a nesting cuckoo with reversed size dimorphism.  
314 *Australian Journal of Zoology*. 56:143–149.
- 315 Miller EH, Baker AJ. 2009. Antiquity of Shorebird Acoustic Displays. *The Auk*. 126:454–459.
- 316 Miller MJ, Lipshutz SE, Smith NG, Bermingham E. 2014. Genetic and phenotypic  
317 characterization of a hybrid zone between polyandrous Northern and Wattled Jacanas in  
318 Western Panama. *BMC Evolutionary Biology*. 14:227.
- 319 Nottebohm F. 1972. The Origins of Vocal Learning. *The American Naturalist*. 106:116–140.
- 320 Odom, KJ, Benedict L. 2018. A call to document female bird songs: Applications for diverse  
321 fields. *The Auk* 135:314–325.
- 322 Odom KJ, Mennill DJ. 2010. A Quantitative Description of the Vocalizations and Vocal  
323 Activity of the Barred Owl. *The Condor*. 112:549–560.

- 324 Pinheiro J, Bates D, DebRoy S, Sarkar D, Heisterkamp S, Van Willigen B. 2018. nlme: Linear  
325 and Nonlinear Mixed Effects Models. R package version 3.1-137, Retrieved from  
326 <https://cran.r-project.org/package=nlme>.
- 327 Price T. 2008. Speciation in Birds. Greenwood Village (CO): Roberts and Company Publishers.
- 328 R-Core-Team. 2015. R: A language and environment for statistical computing. Vienna, Austria:  
329 R Foundation for Statistical Computing.
- 330 Ryan MJ, Brenowitz EA. 1985. The Role of Body Size, Phylogeny, and Ambient Noise in the  
331 Evolution of Bird Song. *The American Naturalist*. 126:87–100.
- 332 Seneviratne SS, Jones IL, Carr SM. 2012. Patterns of vocal divergence in a group of non-oscine  
333 birds (auklets; Alcidae, Charadriiformes), *Evolutionary Ecology Research*. 1:95–112.
- 334 Slabbekoorn H, Smith TB. 2002. Bird song, ecology and speciation, *Philosophical Transactions*  
335 *of the Royal Society B: Biological Sciences*. 357:493–503.
- 336 Sordahl TA. 1979. Vocalizations and behavior of the Willet *Catoptrophorus semipalmatus*.  
337 *Wilson Bulletin*. 91:551–574.
- 338 Sung H-C, Miller EH, Flemming SP. 2005. Breeding vocalizations of the piping plover  
339 (*Charadrius melodus*): structure, diversity, and repertoire organization. *Canadian Journal*  
340 *of Zoology*. 83:579–595.
- 341 Taoka M, Sato T, Kamada T, Okumura H, 1989. Sexual Dimorphism of Chatter-Calls and Vocal  
342 Sex Recognition in Leach's Storm-Petrels (*Oceanodroma leucorhoa*). *The Auk:*  
343 *Ornithological Advances*. 106:498–501.
- 344 Ten Cate C. 1997. Sex Differences in the Vocalizations and Syrinx of the Collared Dove  
345 (*Streptopelia decaocto*). *The Auk*. 114:22–39.

346 Uy JAC, Irwin DE, Webster MS. 2018. Behavioral Isolation and Incipient Speciation in Birds.

347 Annual Review of Ecology, Evolution, and Systematics. 49:1–24.

348

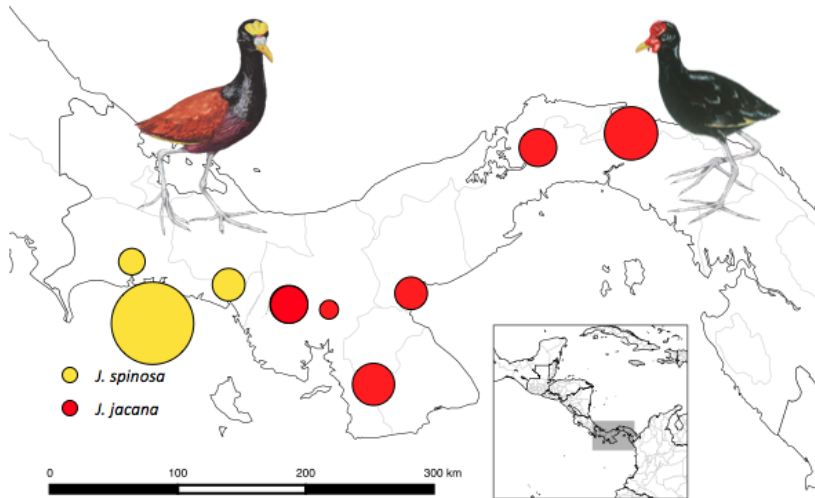

349

350 **Figure 1.** Sampling map of *Jacana spinosa* (yellow) and *J. jacana* (red) vocalizations recorded

351 across the hybrid zone Panama. Circle size represents sample size (minimum 1, maximum 19).



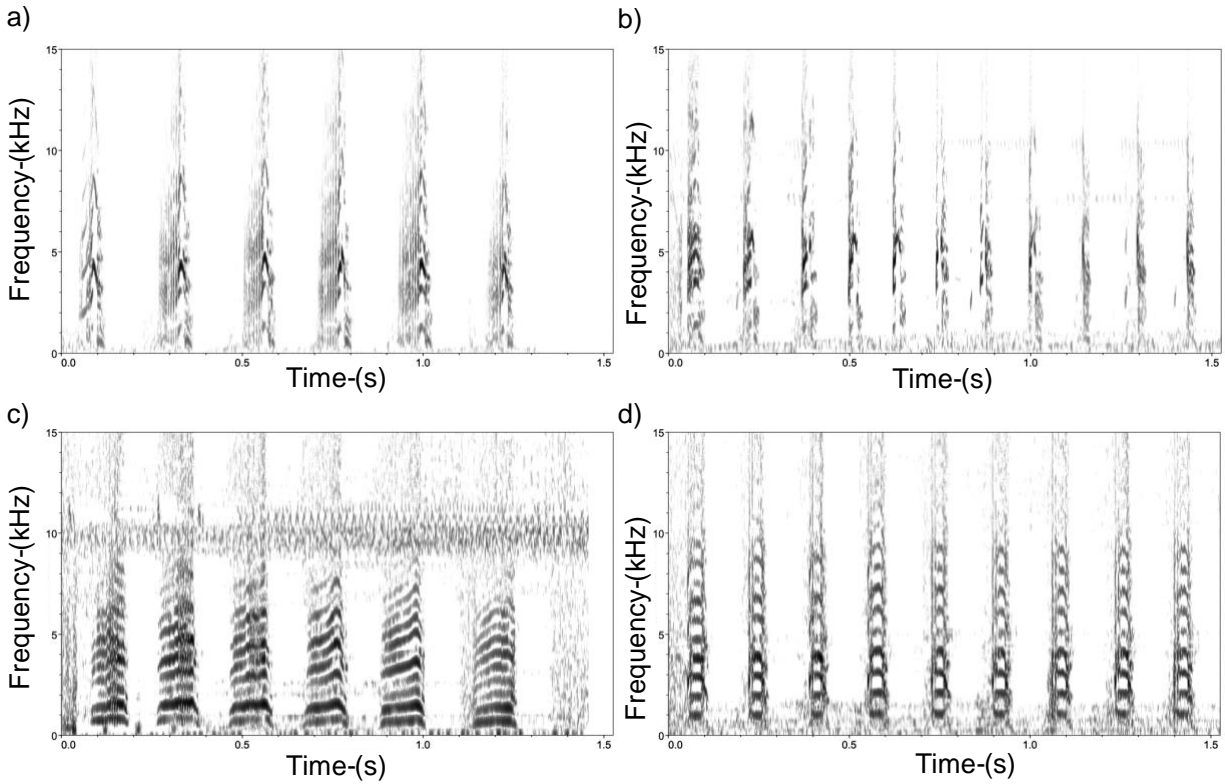

352

353 **Figure 2.** Spectrograms of vocalizations for a) female *J. spinosa*, b) male *J. spinosa*, c) female *J.*

354 *jacana*, d) male *J. jacana*

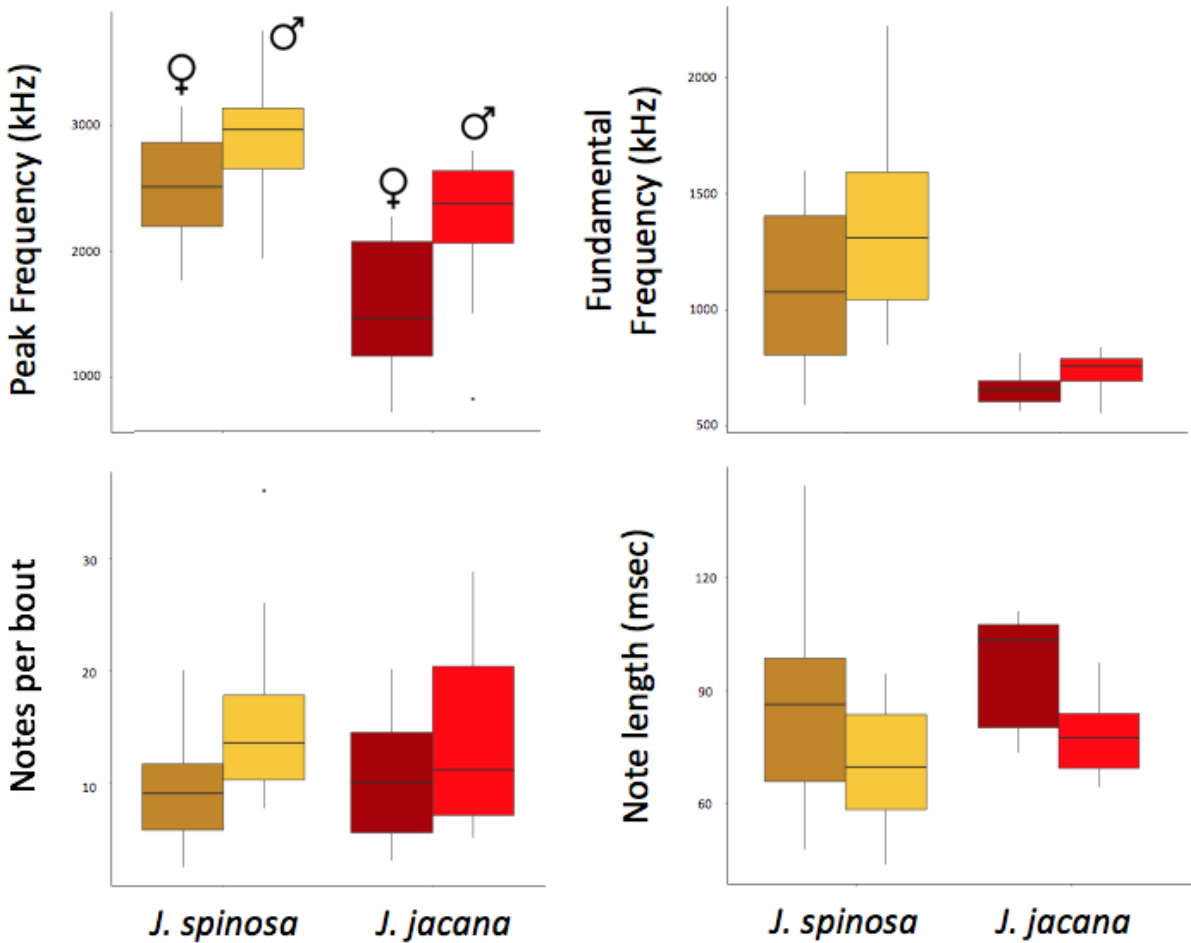

355

356 **Figure 3.** Mean spectral and temporal characteristics for vocalizations recorded from male  
 357 (light) and female (dark) *Jacana spinosa* (yellow) and *J. jacana* (red).

358

**Table 1.** Sampling information and spectral and temporal characteristics (mean  $\pm$  SE) for vocalizations recorded from male and female *Jacana spinosa* and *J. jacana*.

|                            | <i>Jacana spinosa</i> |                     | <i>Jacana jacana</i> |                      |
|----------------------------|-----------------------|---------------------|----------------------|----------------------|
|                            | Male                  | Female              | Male                 | Female               |
| Number of Individuals      | 12                    | 12                  | 12                   | 12                   |
| Notes per Bout             | 15.97 $\pm$ 2.36      | 9.75 $\pm$ 1.55     | 14.03 $\pm$ 2.42     | 10.32 $\pm$ 1.66     |
| Range of Notes per Bout    | 2 – 45                | 2 – 33              | 3 – 70               | 2 – 68               |
| Note Length (ms)           | 70.17 $\pm$ 5.09      | 85.51 $\pm$ 7.52    | 78.12 $\pm$ 2.98     | 95.87 $\pm$ 4.3      |
| Peak Frequency (Hz)        | 2898.36 $\pm$ 129.97  | 2539.14 $\pm$ 129.2 | 2221.52 $\pm$ 166.34 | 1521.63 $\pm$ 161.45 |
| Fundamental Frequency (Hz) | 1346.54 $\pm$ 112.46  | 1099.14 $\pm$ 99.4  | 731.83 $\pm$ 24.71   | 663.84 $\pm$ 23.46   |

359

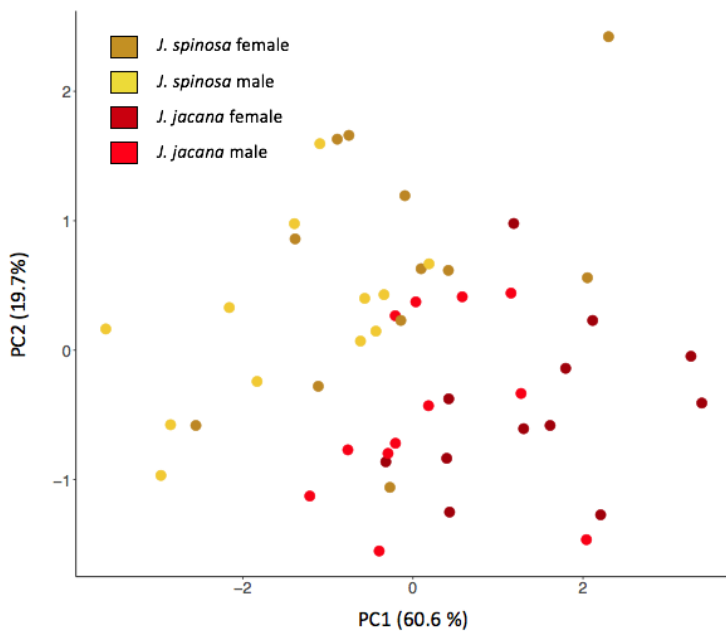

361 **Supplemental Figure 1.** Principal components analysis of *Jacana spinosa* (yellow) and *Jacana*  
362 *jacana* (red) males (light) and female (dark) vocalizations

**Supplemental Table 1.** Loadings for Principal Component Analysis

| Vocal Parameter            | PC1    | PC2    |
|----------------------------|--------|--------|
| Eigenvalue                 | 1.56   | 0.89   |
| Proportion of variance     | 60.60% | 19.70% |
| Note per bout              | -0.47  | -0.58  |
| Note length (ms)           | 0.49   | 0.45   |
| Peak frequency (Hz)        | -0.53  | 0.45   |
| Fundamental frequency (Hz) | -0.52  | 0.5    |

363
